# Minimising lockdown periods for regional elimination of covid-19

David Kault, adjunct snr lect, maths, James Cook University  
and General Practitioner

April 20, 2020

## **Abstract**

Some nations have the option of pursuing a policy of complete elimination of covid-19 instead of a policy of “flattening the curve” so that the load the disease places on medical facilities is bearable. A policy of elimination requires a rather onerous “lockdown”. As the goal of elimination is approached, it is therefore important that there be an informed trade-off between the risk of disease re-emergence and the duration of the “lockdown”. Here it is shown that an important factor in assessing this trade-off, is the distribution of secondary cases, not just the expected value of this distribution,  $R_0$ . It is shown that a distribution in which “super-spreaders” are more prominent in the epidemiology, allows for an earlier release from “lockdown” with reasonable safety despite some probability of asymptomatic cases. There is some evidence to support such a distribution for covid-19. Analytical calculations and simulations show that once there is only one recognised case in some subregion, release from “lockdown” will be reasonably safe after just one or two further incubation periods.

## Introduction

The experience of China indicates that covid-19 can be eliminated. Elimination requires lowering the reproductive rate of the infection by “lockdown” measures until there are very few active cases and then waiting for several incubation periods without new cases before ending the “lockdown”. However, it will always remain possible that, because of asymptomatic cases, the infection will re-emerge after lifting of “lockdown”. This paper shows that the risk of such re-emergence depends quite markedly on the distribution of the number of secondary cases, not just its average value,  $R_0$ .

The importance of the distribution of secondary cases, is illustrated by several contrived probability distributions for the policy where restrictions are lifted once there is just a single symptomatic case. More realistic probability distributions and simulation are used to estimate the probability of re-emergence with three different policies - lifting restrictions when there is just one symptomatic patient, waiting one incubation period after this time before lifting restrictions and waiting two incubation periods before lifting restrictions.

This paper assumes that an attempt has been made to eliminate covid-19 from a region/province/nation. It assumes no appreciable herd immunity. It also assumes that there is no quarantine free cross border human travel into the region considered and this restriction will be maintained. It is assumed that the attempt has been successful in that numbers of symptomatic covid cases have dwindled to a single case which is then isolated.

However, it is known that a proportion of cases are asymptomatic. Here this proportion  $p_a$ , is taken to be 50%. It is further assumed that the symptomatic cases up to their time of isolation and the asymptomatic cases, both have the same distribution for the number of secondary infections they generate. It is assumed that all symptomatic covid cases are recognised by testing but there is no testing of asymptomatic people. It is also assumed that  $R_0$  will resume its pre-covid value when restrictions are lifted. For the purposes of this paper, the average number of secondary cases  $R_0$ , in an unrestricted population is assumed to be 2.5 .

## Methods

It is known from the theory of branching processes in discrete time, that the probability of extinction of a branching process is given by the (smallest) solution to the equation  $\phi(u) = u$  where  $\phi(x)$  is the probability generating function for the number of secondary cases of a single index case [1]. For example, if there is a probability of 0.99 that an index case has no secondary cases and probability 0.01 that the case has 250 secondary cases - giving  $R_0 = 2.5$ , then  $\phi(x) = 0.99x^0 + 0.01x^{250}$ . The solution to the equation  $\phi(u) = u$  is found by Newton's method. It is denoted by  $p_e \equiv p_{extinction}$ . The probability of extinction is calculated similarly for a number of other contrived distributions for the number of secondary cases generated by a single infected person, all with  $R_0 = 2.5$ . The coefficient of variation ( $\frac{\sqrt{variance}}{mean}$ ), is calculated for each of these distributions. The probability of extinction for two standard probability distributions are also calculated. The calculations here assume that once a closed region is down to a single symptomatic case, there may or may not be secondary cases from this case prior to their isolation and there may also be secondary cases from asymptomatic cases present at the time of isolation of this last symptomatic case. However, even where there are such secondary cases, the branching processes from however many secondary cases there are, may go extinct.

We assume as an uninformative Bayesian prior, that the number of asymptomatic cases at the time when there is only 1 symptomatic case, is given by a geometric distribution, so that the probability that there are  $k$  asymptomatic cases is  $(1 - p_a) \times p_a^k$ . The probability that none of these cases give rise to an ongoing chain of secondary, tertiary, ..., cases is denoted by  $p_{T0}$ , the probability of Total elimination. It is found by summing the probability that there are  $k$  asymptomatic cases  $\times p_e^k$  for all  $k$  from 0 to  $\infty$ . This gives 
$$p_{T0} = \frac{(1-p_a)p_e}{1-p_ap_e}$$

Two less contrived, standard, distributions are considered further. These are the Poisson distribution corresponding to an unstructured randomness where any infected person is equally likely as any other to seed many secondary cases. The second distribution is the negative binomial distribution. There is now some evidence from observation of the initiation of the epidemic in various countries, that the initial seeding cases gave rise to offspring cases in a pattern suggestive of a negative binomial distribution with parameters

specified below [2]. This is a distribution with a thin but very long right tail, indicating an important role for super-spreaders. A distribution for the number of secondary cases where very occasional superspreaders are prominent in the epidemic, is also suggested by variation in the time to community transmission in various nations, despite likely repeated introduction by travellers. If most infected travellers seldom spread the disease, the onset of community transmission may be delayed until the rather rare super-spreader arrives.

For the Poisson distribution and this Negative Binomial distribution, two further policy scenarios are considered - continuing restrictions for 1 incubation period after the last symptomatic person has been isolated, and continuing restrictions for 2 incubation periods. It is difficult to obtain an analytic equation for the probability of extinction and so simulation is used. Each simulation employs 10 million runs. A fortran program corresponding to these simulations is given as an attachment.

## Results

The probability distributions considered, all give an expected number of secondary cases,  $R_0 = 2.5$  They are described below, with  $P(\mathbf{X} = k)$  representing the probability of  $k$  secondary cases :-

- 1)  $P(\mathbf{X} = 0) = 0.99$  and  $P(\mathbf{X} = 250) = 0.01$  as in the section above
- 2)  $P(\mathbf{X} = 0) = 0.9$  and  $P(\mathbf{X} = 25) = 0.1$
- 3)  $P(\mathbf{X} = 0) = 0.5$  and  $P(\mathbf{X} = 5) = 0.5$
- 4)  $P(\mathbf{X} = 0) = \frac{1}{6}$  and  $P(\mathbf{X} = 3) = \frac{5}{6}$
- 5)  $P(\mathbf{X} = 2) = \frac{1}{2}$  and  $P(\mathbf{X} = 3) = \frac{1}{2}$  (as close as possible to deterministic  $R_0 = 2.5$ )
- 6)  $P(\mathbf{X} = 0) = P(\mathbf{X} = 1) = \dots = P(\mathbf{X} = 5) = \frac{1}{6}$
- 7)  $P(\mathbf{X} = j)$  is Poisson with parameter  $\lambda = 2.5$
- 8)  $P(\mathbf{X} = j) = \binom{j+r-1}{k} (1-p)^r p^j$  with  $p = \frac{2.5}{2.5+0.1} = 0.96154$  and  $r = 0.1$  This is a Negative Binomial. Its parameters are inferred from details in reference [2] and correspond to  $R_0 = 2.5$  with dispersion measure  $r = 0.1$

The table below gives the probability,  $p_e$ , that a single branching process with the given numbered distribution becomes extinct in that it does not result in an indefinitely large number of descendants. A column giving the coefficient of variation is given for each distribution. Also given is  $p_{T0}$ , that is

the probability that overall there will be no re-emergence of the epidemic, despite releasing restrictions without waiting an incubation period to check for symptomatic cases to arise either from previous unrecognised asymptomatic cases or from the symptomatic case before isolation.

| Distribution number | Coeff of variation | $p_e$ | $p_{T0}$ |
|---------------------|--------------------|-------|----------|
| 1)                  | 9.95               | 0.991 | 0.982    |
| 2)                  | 3.00               | 0.909 | 0.833    |
| 3)                  | 1.00               | 0.519 | 0.350    |
| 4)                  | 0.447              | 0.171 | 0.093    |
| 5)                  | 0.200              | 0.0   | 0.0      |
| 6)                  | 2.79               | 0.211 | 0.118    |
| 7)                  | 0.632              | 0.107 | 0.057    |
| 8)                  | 3.22               | 0.861 | 0.755    |

The following table considers distributions 7) and 8) in more detail. As well as the policy of releasing restrictions zero incubation periods after the last symptomatic case is isolated, simulations are used to calculate the probability of no epidemic re-emergence if there is a policy of releasing restrictions after 1 incubation period and after 2 incubation periods. These probabilities are denoted by  $p_{T1}$  and  $p_{T2}$  respectively. For comparison, information given in the previous table on the probability of extinction if restrictions are lifted on isolation of the last symptomatic case, is repeated.

| Distribution number | $p_{T0}$ | $p_{T1}$ | $p_{T2}$ |
|---------------------|----------|----------|----------|
| 7)                  | 0.057    | 0.608    | 0.894    |
| 8)                  | 0.755    | 0.9805   | 0.9987   |

Unfortunately, in implementing policies whose outcome are denoted  $p_{T1}$  and  $p_{T2}$ , there will be occasions where relief from “lockdown” will be further delayed by re-emergence of symptomatic cases before the one or two incubation periods are completed. In the case of the Poisson distribution labelled 7), this happens 50% and 58% of the time. In the case of the negative binomial distribution labelled 8), this happens 27% and 28% of the time respectively.

## Discussion

A policy of elimination requires a more intense “lockdown” than a policy of “flattening the curve” so that the epidemic peak is within the capacity of a region’s ICU beds. However, a study by the Imperial College [3] shows that there are two rather fine lines between flattening the curve sufficiently and on the one hand, elimination, or on the other hand, an insufficiently flattened epidemic and a huge death rate. Even if “optimal” curve flattening can be achieved there will still be many deaths. In addition, whilst slightly less intense lockdown is required for curve flattening rather than elimination, the period of “lockdown” for curve flattening, will have to be continued for far longer. An advantage of the curve flattening approach is that curve flattening could lead to herd immunity and thus allow less restricted international travel to parts of the world that have not achieved elimination, though this prospect is uncertain. On the other hand, international travel without quarantine will not be possible between a country that has achieved elimination and a country which has not, at least until a vaccine is available. For this author, the arguments in favour of a policy of elimination are overwhelming, for nations/regions which have the resources to implement it and who have secure borders. New Zealand is following a policy of elimination and there seems to be emerging realisation that this is a real option for Australia. Since the intensity of “lockdown” required for elimination will be quite onerous, it is important that the length of “lockdown” required is balanced against the probability that this lockdown period will be successful in eliminating the virus.

It is clear from the results, that simple knowledge of  $R_0 = 2.5$  is not sufficient for calculations that will enable decision makers to balance risk of re-emergence of the epidemic against length of lockdown. In general, it can be seen that distributions with a large coefficient of variation, that is, distributions which in this context give a greater role to occasional super-spreaders, are those where elimination can be achieved more quickly after the last symptomatic case is diagnosed. The negative binomial distribution used here gives a large role in the epidemic for occasional superspreaders, in contrast to the Poisson distribution. There is also some evidence for the negative binomial distribution with the parameters given. Commonsense would also suggest that people are unlikely to be uniform in their propensity to spread the virus, either because socially they are a more central node in a

large network, or perhaps because some may have more biological propensity to infect others. However, even with the less likely, more pessimistic choice, the Poisson distribution, the calculations show that there is better than 89% chance of elimination if two incubation periods pass without re-emergence of symptomatic cases. With the Negative Binomial distribution, elimination would then be almost certain. It would seem that, when numbers of symptomatic cases have been reduced to rather low levels, lockdown periods, could be decreased further by subdividing a region. If a region implementing an elimination strategy can be subdivided into subregions which can be temporarily disconnected from each other in terms of human travel, such that each subregion has only one case, relief from restrictions can commence quite quickly.

There are some clear limitations to this study. No sensitivity analysis has been done beyond calculations for the specific distributions described. In particular, there is no sensitivity analysis for likely different values for the proportion asymptomatic  $p_a$ , or  $R_0$  under lockdown. However, the fortran programs below could facilitate such a sensitivity analysis if there was more knowledge about the range of plausible values. The calculations and simulations also assume discrete time steps and a different analysis will be required to account for branching in continuous time. There are some assumptions that are too pessimistic, for example, some asymptomatic cases will be detected by contact tracing. There is also implicitly some assumptions that may be too optimistic. For example, it is assumed that there is no animal or human long term carrier of the virus in the region under consideration. Nevertheless this study gives cause for optimism about the length of lockdown required for any region attempting to eliminate this disease.

## References

- [1] W Feller. Probability Theory and its Applications. Vol 1 P275, 2<sup>nd</sup> edition , Wiley, 1961
- [2] A Endo et al. Estimating the overdispersion in COVID-19 transmission using outbreak sizes outside China. Wellcome Open Research, awaiting peer review. Accessed 19/4/2020
- [3] Neil M Ferguson, Daniel Laydon, Gemma Nedjati-Gilani et al. Impact of non-pharmaceutical interventions (NPIs) to reduce COVID-19 mortality and healthcare demand. Imperial College London (16-03-2020), doi: <https://doi.org/10.25561/77482>.

## Attachments

Fortran program using Newton's method to calculate the probability of extinction of the branching process for various probability distributions

```
! prog to calculate prob extinction for various distributions with R0=2.5, using Newton's method
! an individual pair of initial statement functions needs to be "uncommented" for a particular run
! xnum(x) is the function phi(x)-x, where phi(x) is the pgf of the relevant distribution.
! xden(x) is the derivative of xnum(x)
! Case 1)
!   xden(x)=2.5*x**249-1.
!   xnum(x)=0.99+0.01*x**250-x
! Case 2)
!   xden(x)=2.5*x**24-1.
!   xnum(x)=0.9+0.1*x**25 -x
! Case 3)
!   xden(x)=2.5*x**4-1.
!   xnum(x)=(0.5+0.5*x**5)-x
! Case 4)
!   xden(x)=2.5*x**2-1.
!   xnum(x)=(1.+5.*x**3)/6.-x
! Case 5)
!   Clearly no possibility of extinction
! Case 6)
!   xden(x)=(1.+2.*x+3.*x**2+4.*x**3+5.*x**4)/6.-1.
!   xnum(x)=(1.+x+x**2+x**3+x**4+x**5)/6.-x
! Case 7) Poisson
!   xden(x)=-1.+2.5*exp((x-1.)*2.5)
!   xnum(x)=exp((x-1.)*2.5)-x
! Case 8) neg bi r=0.1 p= 0.96154 so 1-p=0.03846
!   xden(x)=(0.03846**0.1)+0.096154*((1.-0.96154*x)**(-1.1))-1.
!   xnum(x)=(0.03846/(1.-0.96154*x))**0.1-x
!   pa=0.5
! initialise newton iteration to find zero of f(u)=phi(u)-u
! x=0.86068 !may need adjustment for convergence
! Do i=1,10
!   xnew=x-xnum(x)/xden(x)
!   print *, 'x,xnum,xden xnew',x,xnum(x),xden(x),xnew
!   x=xnew
```



```

end do
pe=xnew
pt=pa*pe/(1.-(1.-pa)*pe)
! pe is the probability of extinction of a branching process from a single individual
! pt is the probability of extinction of all descendants, assuming that there are an additional number
! geometrically distributed (with parameter pa) asymptomatic cases
print *,'pe= ',pe,'pt= ',pt
stop
end

```

The fortran program below calculates by simulation, the probability of elimination when there are two incubation periods in which, under “lock-down” conditions, number of secondary cases are determined by a negative binomial distribution, with  $R_0$  reduced from 2.5 to 0.8, but with the original coefficient of variation unchanged. This is achieved by changing  $r$  from 0.1 to  $\frac{20}{183}$  and changing  $p$  from  $\frac{2.5}{2.6}$  to  $\frac{183}{208}$ . Since this negative binomial is used repeatedly in the simulation, it is useful to calculate its cumulative distribution using a separate program. Because of numerical instability the distribution is truncated at 170 secondary cases with some arbitrary provision for the the tiny but not entirely negligible tail beyond 170. It will be clear to fortran programmers how the program can be simplified to deal with a policy of lifting lockdown after one instead of two incubation periods. It will similarly be clear how to modify it for a Poisson distribution with  $\lambda = 0.8$  during the lockdown period and with  $p_e$  changed so that it is the probability of extinction for a Poisson branching process given in the first table. A few other very short, almost trivial, programs are also used in this project. They are not copied here but are available on request to the author.

```

! program to simulate stopping rule for anti-covid measures
! simulates probability of no re-emergence if stopping after one incubation period with no symptomatic found
Dimension cumprob(0:170)
!
! Open file relating a random number between 0 and 1 to number of outcomes of the neg binom distribution
Open(20,file="cumnegbinom.dat") ! cumulative negative binomial distribution with p=25/26 and r=0.1 No!!!!
! cum neg binom modified so R0 at 0.8
Do i=0,170
  read(20,*)cumprob(i)
end do
pa=0.5 ! prob of someone infected being asymptomatic
pe=0.86068 ! prob of extinction of line from a single case with neg binomial distribution with parameters p=25/26, r=0.1.
! ie when normal R0 is resumed

! Initialise counters
isum=0 ! Counter for number of cases where there are symptomatic offspring after 1 incubation period in lockdown
isum2=0 ! Counter for number of cases where there are symptomatic offspring after 2 incubation periods in lockdown
isumsuxs=0 ! Counter for number of cases where at least one offspring is infected and gives lines that don't go extinct
! after two incubation periods
nnn=10000000 ! number of runs regardless of whether they generate a pattern that satisfies stopping rule

! Start big loop iterating through nnn cases with random numbers determining undetected cases

bigloop:Do n=1,nnn

! find probability that there are m asymptomatics as well as the last index symptomatic
m= igeomran(idum) !Tthis calls a function which gives a number from a geometric random variablewith parameter pa
mp1=m+1

```

```

! Count offspring of index case plus offspring of all asymptomatics

      call totoffcalc(mp1,cumprob,ioffspring) !ioffspring is a counter for total number of offspring from m+1 neg binom distributions

!      print *,'mp1 ioffspring',mp1,ioffspring

! Now need to find probability that all offspring are asymptomatic and if so the probability that all lines of descent from these asymptomatics
! end in extinction.
! Go back to beginning without counting stopping rule as a failure if still >=1 symptomatics present

      w=ran3(idum)                !Uniform random number generator
      if(w>pa**ioffspring)then    !This gives a probability 1- pa^ioffspring so it is the probability there are ioffspring
!                                and some are symptomatic.
          isum=isum+1            !Need to count such cases so that we can deduct them from our nnn simulations
          cycle bigloop         !as they do not meet the stopping rule protocol
      else

          call totoffcalc(ioffspring,cumprob,ioffsprng2)

          w=ran3(idum)
          if(w>pa**ioffsprng2)then !This gives a probability 1- pa^ioffsprng2 so it is the probability there are ioffsprng2
!                                ! with some symptomatic. Need to count such cases so that we can deduct them from our nnn simulations
              isum=isum+1
              cycle bigloop     !as they do not meet the stopping rule protocol
          end if

          w=ran3(idum)
          if(w<pe**ioffsprng2)then ! we have met the stopping rule protocol and all remaining lines go extinct
              isumsuxs=isumsuxs+1
          end if
      end if

!!      print *,'ptotextinct,w,is,isuxs ',ptotextinct,w,isum,isumsuxs

      end do bigloop

      probsuccess=real(isumsuxs)/real(nnn-isum)

      print *,'isumsuxs,isum,probsuccess',isumsuxs,isum,probsuccess

      stop
      end

      subroutine totoffcalc(mp1,cumprob,ioffspring)
      Dimension cumprob(0:170)
      ioffspring=0
      Do j=1,mp1
          v=ran3(idum)
!!          print *,'v=',v
          Do i=0,170
              if(v<cumprob(i))then
!                  print *,'i,v,cump(0),cump(i)',i,v,cumprob(0),cumprob(i)
                  exit
              end if
          end do
! Numerical instability prevents calculation of prob negbinom>170, but first 170 account for 0.99997 of distribution
          k=i
          if(v>cumprob(170))k=200
!          print *,'i,k=',i,k
          ioffspring=ioffspring +k
      end do
      return
      end

```
